## Core respiratory microbiome of the blue whale, *Balaenoptera musculus*

Carlos A. Domínguez-Sánchez<sup>1</sup>, Roberto C. Álvarez-Martínez<sup>1</sup>, Diane Gendron<sup>3</sup>, Karina Acevedo-Whitehouse,<sup>4,\*</sup>

<sup>1</sup> Unit for Basic and Applied Microbiology. School of Natural Sciences. Autonomous University of Queretaro, Queretaro, Mexico.

<sup>2</sup> Instituto Politécnico Nacional, Centro Interdisciplinario de Ciencias Marinas, La Paz, Baja California Sur, Mexico.

\* Address correspondence to: Karina Acevedo-Whitehouse,  
karina.acevedo.whitehouse@uaq.mx

## Core respiratory microbiome of the blue whale, *Balaenoptera musculus*

Domínguez-Sánchez C, Álvarez-Martínez RC, Gendron D, Acevedo-Whitehouse K

### Summary

The number of strandings and unusual mortality events that involve marine mammals may have increased, and potential pathogens of the respiratory tract have been found during examination of individuals in many of these events. Given that the core microbiome is key to understand host-bacteria relationships and to identify their relevance for host health, we characterized the core respiratory microbiome of the Eastern North Pacific blue whale, *Balaenoptera musculus*, using blow samples collected by a small quadcopter drone. 16S rRNA gene high-throughput sequencing revealed 2,732 amplicon sequence variants (ASVs) of which 18 were shared by more than 50% of all blue whales and were considered as the core respiratory microbiome. Sixteen bacterial classes with a relative abundance higher than 0.02% were identified in the blow samples, and eight of these were also found in the seawater samples. Nonetheless, blow samples harboured classes not commonly found in seawater, such as *Acidimicrobia*, *Actinobacteria*, *Campylobacteria*, *Erysipelotrichia*, *Leptospirae*, *Mollicutes*, and *Oxyphotobacteria*. Only one whale presented a potential pathogen, *Mycoplasma*, associated with pulmonary pathology in mammals. Ours is the first study to characterize the respiratory microbiome of apparently healthy blue whales. The core microbiome identified here could be used as a baseline for future long-term studies on blue whale health.

**Key words:** microbiome, blue whale, *Balaenoptera musculus*, respiratory tract, bacteria, 16S rRNA gene

## Core respiratory microbiome of the blue whale, *Balaenoptera musculus*

Domínguez-Sánchez C, Álvarez-Martínez RC, Gendron D, Acevedo-Whitehouse K

### Introduction

The advent of modern technologies that allow identification of all bacteria present in environmental or clinical samples (Haegeman *et al.*, 2013; Salter *et al.*, 2014; Rhodes *et al.*, 2022) has led to a myriad of studies on the abundance, diversity and structure of the microbiome of different species (Nelson *et al.*, 2015; Watkins *et al.*, 2022). One of the reasons why it is paramount to increase our knowledge about the microbiome of a given species is because the microbial communities associated with a particular organ can impact the host's physiology (Foster *et al.*, 2017), and even play an important role in its health status (Zaura *et al.*, 2009; Huse *et al.*, 2012; Chaban *et al.*, 2013; Huang *et al.*, 2016; Bierlich *et al.*, 2018; Watkins *et al.*, 2022). For example, respiratory infections can occur when opportunistic microorganisms, which are normally part of the microbiome of a healthy respiratory tract, preferentially flourish under certain conditions (Hilty *et al.*, 2010; Dickson *et al.*, 2016; Rhodes *et al.*, 2022), and *de novo* infections may occur if individuals are exposed to pathogens. In turn, infections can trigger changes in the diversity and composition of the original microbial communities, an event known as dysbiosis (Gagliardi *et al.*, 2018; Infante-Villamil *et al.*, 2020; Sehnal *et al.*, 2021). Therefore, the composition of the microbiome may even be a better predictive marker of progression of a disease, than the simple presence of the specific pathogen commonly associated with the disease. This is why having knowledge about the microbiome composition and how it varies between healthy and sick animals could become an important tool with which to assess the health status of an individual (Shreiner *et al.*, 2015).

## Core respiratory microbiome of the blue whale, *Balaenoptera musculus*

Domínguez-Sánchez C, Álvarez-Martínez RC, Gendron D, Acevedo-Whitehouse K

When attempting to use the microbiome to help assess health status, one must distinguish between commensal, opportunistic and transient bacteria (Huang *et al.*, 2016; Infante-Villamil *et al.*, 2020). To do this, it is necessary to identify the bacterial taxa that predominate in the community and that are shared by healthy individuals (Huse *et al.*, 2012; The Human Microbiome Project Consortium; 2012; Willis *et al.*, 2020), a concept known as *the core microbiome*, which plays an important role in maintaining the functional stability and homeostasis of a specific habitat (e.g., skin, gut, lungs) of the host (Shade and Handelsman, 2012; Hernandez-Agreda *et al.*, 2017; Thomas *et al.*, 2017; Björk *et al.*, 2018; Ross *et al.*, 2019). The definition of the core microbiome varies across authors, although they tend to overlap in many of the components of the microbial community (Risely, 2020). Different approaches to define the core microbiome have included the temporal stability (i.e. *dynamic core*, which refers to those bacterial taxa that are present across different stages of the host; Shade and Handelsman, 2012; Ozkan *et al.*, 2017), functional level (i.e. *functional core*: which refers to the set of bacterial genes that are important for host metabolic processes; Dinsdale *et al.*, 2008), ecological influence (i.e. *ecological core*: which refers to bacterial taxa that are important for shaping the structure of their communities; Coyte and Rakoff-Nahoum, 2019; Coyte *et al.*, 2019), host fitness (i.e. *host-adapted core*: which refers to those taxa whose presence increases host fitness; Shapira, 2016), and bacterial occupancy frequency (i.e. *common core*: which refers to the most widespread bacterial taxa that are shared by a considerable proportion of hosts; Huse *et al.*, 2012; Nishida and Ochman, 2017; Bierlich *et al.*, 2018; Ingala *et al.*, 2018; Risely, 2020).

## Core respiratory microbiome of the blue whale, *Balaenoptera musculus*

Domínguez-Sánchez C, Álvarez-Martínez RC, Gendron D, Acevedo-Whitehouse K

Regardless of the approach chosen, identifying the common core bacteriome requires setting the detection threshold (relative abundance) and the occurrence percentage (prevalence) of bacterial taxa (Astudillo-García *et al.*, 2017), criteria which have varied widely among published studies (Risely, 2020), with common core annotations ranging from as low as 30% (e.g., Ainsworth *et al.*, 2015) to 100% prevalences (e.g. Huse *et al.*, 2012; Apprill *et al.*, 2017; Hernandez-Agreda *et al.*, 2017; Antwis *et al.*, 2018), and detection thresholds varying from 0.001% to 0.1% (Astudillo-García *et al.*, 2017; Antwis *et al.*, 2018). Given that biological justifications for such prevalence and thresholds values are rare (Risely, 2020), it is important to recognize the arbitrary aspect of the common core definition and to be cautious when interpreting the results. However, the microbiome common core tends to be robust despite varying definitions, particularly when samples from closely related individuals are analysed (Astudillo-García *et al.*, 2017; Risely, 2020).

Bacteria of the mammalian microbiome are found in composite communities (Lee and Mazmanian, 2010; Rhodes *et al.*, 2022) whose diversity and abundance is determined by multiple interactions between species (Shade and Handelsman, 2012; Stubbendieck *et al.*, 2016). The cetacean microbiome has recently begun to be studied and important initial assessments of microbial diversity have been made for a few species (Venn-Watson *et al.*, 2008; Johnson *et al.*, 2009; Lima *et al.*, 2012; Bik *et al.*, 2016; Soverini *et al.*, 2016; Raverty *et al.*, 2017; Rhodes *et al.*, 2022). Among cetaceans, baleen whales play important roles in the marine ecosystem, as they are long-lived, contribute to the movement and storage of carbon (Pershing *et al.*, 2010) and are considered sentinels of ocean health (Moore *et al.*,

## Core respiratory microbiome of the blue whale, *Balaenoptera musculus*

Domínguez-Sánchez C, Álvarez-Martínez RC, Gendron D, Acevedo-Whitehouse K

2019; Palmer *et al.*, 2022). However, to date, little is known about the respiratory microbiome of baleen whales, and while some opportunistic pathogens of the respiratory tract have been described for live free-ranging individuals of a few baleen whale species (Acevedo-Whitehouse *et al.*, 2010), to the best of our knowledge, there is only one published study on the core respiratory microbiome of a baleen whale, the humpback whale, *Megaptera novaeangliae* (Apprill *et al.*, 2017).

In this study, we characterized the common core respiratory microbiome of the Eastern North Pacific blue whale, using next generation sequencing on 17 blow samples collected from adult blue whales by a non-invasive drone-based technique (Domínguez-Sánchez *et al.*, 2018) during the boreal winter months in the Gulf of California.

## Results

A total of 20 samples were collected and analysed in this study. These samples included 17 photo-identified blue whales and three technical controls (seawater, human sneeze, and PCR blank). Exhaled breath samples were collected from animals in the Gulf of California using a small drone. No adverse behaviour was detected before, during or after sampling (see Domínguez-Sánchez *et al.*, 2018). We identified 379,813 sequences (of which 23,585 were unique sequences) corresponding to the sum of readings identified in the blow samples and technical controls, which ranged from 12,146 to 32,148, and from 12,646 to 20,471 sequences, respectively. These corresponded to 2,732 amplicon sequence variants (ASVs). The sample coverage (i.e., the proportion of the total number of individuals in a community

## Core respiratory microbiome of the blue whale, *Balaenoptera musculus*

Domínguez-Sánchez C, Álvarez-Martínez RC, Gendron D, Acevedo-Whitehouse K

that belong to the species represented in the sample; Chao and Chiu, 2016) exceeded 98% in all cases. Alpha diversity measures of all samples (blow and technical controls) (Fig. 1) revealed that species richness (S) ranged from 165 to 924 (mean = 453.35); Simpson's index of diversity (D) ranged from 0.55 to 0.99 (mean = 0.95). Blow samples (S mean = 486.5, D mean = 0.94) were different from the controls (S mean = 265.6, D mean = 0.98) in those metrics ( $p = 0.0052$ , and  $p = 0.017$ ; respectively). Beta diversity differed significantly between the blow samples and the technical control samples (PERMANOVA,  $F = 17.677$ ,  $P > 0.001$ ).

The phylogenetically diverse sequence assemblage of all samples (whale blows and technical controls) reached sixteen identified bacterial classes (Fig. 2). Some of these classes were shared between seawater and blow samples, including *Bacilli*, *Gammaproteobacteria* (the most abundant class in seawater, representing 20.9% of relative abundance), *Clostridia*, *Negativicutes*, and *Verrucomicrobiae*. However, blow samples harboured classes that are not commonly found in seawater, such as, *Actinobacteria*, *Alphaproteobacteria*, *Campylobacteria*, *Erysipelotrichia*, *Leptospirae*, and *Mollicutes* (Fig. 2). *Acidiomicrobia* and *Oxyphotobacteria* was identified only in two whales (Bm051 and Bm056) and two technical controls (ControlCADS and ControlWater). Only one whale blow (Bm057) had a high abundance of *Mycoplasma* spp. (34.4% of relative abundance).

Eighteen ASVs were present in more than 50% of the blow samples (Fig. 3) and were considered as the common core microbiome of the respiratory tract of the blue whales in the

## Core respiratory microbiome of the blue whale, *Balaenoptera musculus*

Domínguez-Sánchez C, Álvarez-Martínez RC, Gendron D, Acevedo-Whitehouse K

Gulf of California (Table 1). These common core members spanned ten bacterial families (Campylobacteraceae, *Cardiobacteriaceae*, *Erysipelotrichiaceae*, *Flavobacteriaceae*, *Lachnospiraceae*, *Leptotrichiaceae*, *Moraxellaceae*, *Porphyromonadaceae*, *Prevotellaceae* and *Propionibacteriaceae*). Additionally, analysing changes in the pattern of the common central microbiome, based on a range of prevalences and detection threshold values, it was possible to identify that the common central microbiome of blue whale blow can vary from 1166 ASV (5% prevalence and 0.001 detection threshold) to 1 ASV (80% prevalence and 0.02 detection threshold), in all cases revealing *Cutibacterium* spp. as the genus with the highest prevalence in blue whale blow samples. This bacterium was also identified in two technical controls (ControlCADS and ControlLab), with a relative abundance of 14.8%, and 3.6%, respectively. The most abundant genus identified in seawater was *Herbaspirillum* spp. This genus was detected in only three samples (Bm023, Bm043, and Bm059) with relative abundances of 6.1%, 8.3% and 8.7%, respectively, compared to 14.5% in the seawater sample.

## Discussion

Recent studies of the human respiratory microbiome have shown that bacterial communities of the respiratory tract are key to maintaining respiratory health (Glendinning *et al.*, 2017; Olufunmilola *et al.*, 2020; Santacroce *et al.*, 2020), not only in terms of their metabolic contribution (Van Treuren and Dodd, 2019), but also because they prevent the colonization of the epithelium by environmental pathogens (Man *et al.*, 2017; Yamamoto *et al.*, 2021).

## **Core respiratory microbiome of the blue whale, *Balaenoptera musculus***

Domínguez-Sánchez C, Álvarez-Martínez RC, Gendron D, Acevedo-Whitehouse K

Identifying the composition and abundance of the bacterial communities that constitute the microbiome of healthy individuals is an important step to establishing a baseline that will help identify bacteria associated with respiratory diseases (Lemon *et al.*, 2010; Lima *et al.*, 2012), assess chronic states of suboptimal health (Mackenzie *et al.*, 2017) and predict community changes due to perturbation (Shade and Handelsman, 2012; Yamamoto *et al.*, 2021).

We aimed to characterize the respiratory microbiome of the blue whale, the planet's largest extant animal. The results of our study demonstrated that the blow of this baleen whale species supports a diverse and rich community of bacteria. We identified 2,732 ASVs with high sample coverage and with varying levels of richness and relative abundance among samples, which could be an indicator of temporary fluctuations in the composition of the microbiome (Eloe-fadrosch and Rasko, 2013). Richness and relative abundance of microbiome varies among healthy animals (The Human Microbiome Project Consortium, 2012) and this is determined mainly by bacterial immigration from the environment to the lungs during inhalation, bacterial elimination via mucociliary clearance, and a relatively small contribution of growth rate of each bacterial community (Dickson, *et al.*, 2014; Dickson *et al.*, 2016; Huffnagle *et al.*, 2017). Evidently, we cannot rule out that the observed variation was also related to differences in the volume of blow collected, which due to the nature of our collection technique, could not be standardized. On one hand, whales are likely to differ in the amount of exhaled breath condensate exhaled, depending on the whale's size, and the depth and duration of the dive. Furthermore, although drones are safe, minimally

## Core respiratory microbiome of the blue whale, *Balaenoptera musculus*

Domínguez-Sánchez C, Álvarez-Martínez RC, Gendron D, Acevedo-Whitehouse K

invasive, and seem to not affect the whales during blow collection (Domínguez-Sánchez *et al.*, 2018), inherent limitations such as flight height and different wind conditions, could potentially result in different volumes of blow being collected (Apprill *et al.*, 2017).

There are various indexes that are used to estimate the diversity of the microbial communities. In our study we used Simpson's diversity index because it considers both richness and evenness (Johnson and Burnet, 2016) and was previously identified as one of the most accurate estimators of diversity in an unknown bacterial community (Haegeman *et al.*, 2013; Johnson and Burnet, 2016). In our study, Simpson's diversity index averaged 0.94 (minimum = 0.55, maximum = 0.98), demonstrating high bacterial diversity in the blow of the whales that we sampled. Some studies have shown that the microbiome of a healthy animal tends to have a high diversity, which presumably allows it to tolerate or counteract changes that may occur due to extrinsic challenges (Chan *et al.*, 2013; Gibson *et al.*, 2019; Jiménez *et al.*, 2019). Bacterial diversity was high in nearly all of the blue whale blow samples, and the composition of the microbiome was dominated mainly by members of the phyla Actinobacteria, Firmicutes and Proteobacteria, which have been reported as major components of the healthy respiratory microbiome of other mammals (Chaban *et al.*, 2013; Dickson *et al.*, 2016, Rhodes *et al.*, 2022). Simpson's diversity index was similar to that reported for humpback whale blow (Apprill *et al.*, 2017) and bottlenose dolphin blowhole (Johnson *et al.*, 2009; Bik *et al.*, 2016). It is likely that these results are evidence that the respiratory microbiome diversity (based on Simpson's index) remains preserved among cetaceans. However, the blue whale blow had nearly twice the taxonomic richness than

## Core respiratory microbiome of the blue whale, *Balaenoptera musculus*

Domínguez-Sánchez C, Álvarez-Martínez RC, Gendron D, Acevedo-Whitehouse K

reported for humpback whales. In our samples, the percentage of "others" (sum of bacteria that does not reach the detection threshold of 0.02%) was higher than in humpback whales (see Apprill *et al.*, 2017). Based on this result, we suggest that the microbiome of the blue whale respiratory system might be more complex than that of the humpback whale. At this stage we can only speculate about the reasons that could give rise to such a difference. This may be due to having used DADA2 for resolving ASVs rather than minimum entropy decomposition (MEDs; Eren *et al.*, 2015), which were used in the previous study, given that although similar in what they report, ASVs are better at removing erroneous sequences (Callahan *et al.*, 2016; Ahlgren *et al.*, 2019). As the algorithm DADA2 allows for the independent analysis or grouping of samples, we conducted pooled analyses to increase sensitivity to detect ASVs that could be present at very low frequencies in multiple samples (Callahan *et al.*, 2016). This approach could explain why a higher percentage (mean = 30.91%) of "rare bacterial biosphere" (Pedrós-Alió, 2012) was identified in our study than in the humpback whale study (see Apprill *et al.*, 2017). This "rare bacterial biosphere", formed by bacteria that are present at low relative abundances are particularly important for dealing with dysbiosis, as they could be considered as a seed bank of genetic resources that can lead the restoration of the core microbiome (Pedrós-Alió, 2012; Skopina *et al.*, 2016; Jousset *et al.*, 2017). A more complex respiratory microbial community is likely to be beneficial to the whales, given that microbiomes with higher richness of species have more synergistic interactions between bacterial taxa, that improve the functioning of the ecosystem (Bell *et al.*, 2005). It is worth mentioning that most studies published to date do not consider the bacterial taxa found in low abundances to be relevant; however, these small populations are

## Core respiratory microbiome of the blue whale, *Balaenoptera musculus*

Domínguez-Sánchez C, Álvarez-Martínez RC, Gendron D, Acevedo-Whitehouse K

now thought to play an important role for the functioning of the ecosystem (Willis *et al.*, 2017) and host health (Guss *et al.*, 2011; Jouseet *et al.*, 2017). It has been demonstrated that high diversity of low-abundance bacteria is correlated with less severe bacterial infections in human lungs (Van der Gast *et al.*, 2011).

Eight bacterial phyla were identified in the blow samples, and some of these were also found in the seawater samples. This is unsurprising, as there is likely to be some seawater carried over when the whales exhale. However, the blow samples harboured ASVs belonging to bacterial classes that were not found in the seawater technical control. These bacteria included genera such as *Actinobacteria*, *Alphaproteobacteria*, *Campylobacteria*, *Erysipelotrichia*, *Leptospirae*, and *Mollicutes*. This shows that despite potential carry over of sea water to the blow during exhalation, bacterial communities of the blue whale respiratory tract are different than those of seawater. Having found *Acidiomicrobia* and *Oxyphotobacteria* in two whales (Bm051 and Bm056) and two technical controls (ControlCADS and ControlWater), may be suggestive of contamination. Nevertheless, is interesting that those bacterial classes were not found in seawater (ControlWater) as they are bacteria reported in marine algae and corals (Hernandez-Agreda *et al.*, 2017; Pearman *et al.*, 2019; Garcia-Pichel *et al.*, 2020).

Eighteen ASVs belonging to the families Campylobacteraceae, *Cardiobacteriaceae*, *Erysipelotrichiaceae*, *Flavobacteriaceae*, *Lachnospiraceae*, *Leptotrichiaceae*, *Moraxellaceae*, *Porphyromonadaceae*, *Prevotellaceae* and *Propionibacteriaceae*; were

## Core respiratory microbiome of the blue whale, *Balaenoptera musculus*

Domínguez-Sánchez C, Álvarez-Martínez RC, Gendron D, Acevedo-Whitehouse K

shared in more than a half of the blue whale's samples and we considered them to be the common core respiratory microbiome. It appears that interindividual variability of the blue whales' respiratory microbiome is higher compared to that of the humpback whale, as 25 distinct bacteria were found to be shared among all the animals sampled (Apprill *et al.*, 2017). One bacterial genus (*Porphyromonas*) detected here was previously found in humpback whale skin (Apprill *et al.*, 2014) and humpback whale blow (Apprill *et al.*, 2017). *Porphyromonas* and *Fusobacterium* have been described as bacteria of the core pulmonary microbiome in humans (Erb-Downward *et al.*, 2011; Charlson *et al.*, 2012; Huang *et al.*, 2013; Morris *et al.*, 2013; Cui *et al.*, 2014). These bacteria have also been reported sporadically and in low abundance in the respiratory tract of sheep (Glendinning *et al.*, 2016). We also identified *Moraxella* spp. in the blue whale blow. This bacterial genus is present in the humpback whale blow (Apprill *et al.*, 2017) and is commonly found in the lungs of healthy dogs (Tress *et al.*, 2017), although it has also been reported in humans (Yi *et al.*, 2014) and cattle with respiratory diseases (Lima *et al.*, 2016). The bacteria identified in the blue whale respiratory tract are similar to those reported in other mammals, and some of them are known to cause disease. At this stage we are unable to unequivocally establish that the health of the whales sampled was not compromised; however, given that they were present in most of the whales, we can assume that they are part of their respiratory microbiome, and that they are likely to reflect a healthy respiratory tract.

Interestingly, three bacterial genera (*Staphylococcus*, *Propinebacterium*, *Corinebacterium*) that were identified in the blue whale blow are associated with the skin of humans and other

## Core respiratory microbiome of the blue whale, *Balaenoptera musculus*

Domínguez-Sánchez C, Álvarez-Martínez RC, Gendron D, Acevedo-Whitehouse K

terrestrial mammals (Grice and Segre, 2011; Byrd *et al.*, 2018; Worthing *et al.*, 2018) and were recently identified as part of the skin microbiota of captive bottlenose dolphins (*Tursiops truncatus*), killer whales, and free-ranging humpback whales (Apprill *et al.*, 2014; Chiarello *et al.*, 2017; Hooper *et al.*, 2018; Rhodes *et al.*, 2022). It is likely that their presence in the blow samples indicates that they colonize the blowhole epithelial lining of blue whales and be expelled forcefully during exhalation (Apprill *et al.*, 2017), leading to their presence in the blow samples.

An unexpected finding was *Herbaspirillum* spp., a bacterial genus that tends to be found in soil and freshwater environments (Dobritsa *et al.*, 2010), and that has also been identified as a contaminant in 16S rRNA gene sequencing, most often during sample preparation, as it has been isolated from deionized water (Grahm *et al.*, 2003; Mohammadi *et al.*, 2005; Bohus *et al.*, 2011; Kéki *et al.*, 2013). Nonetheless, this was the most abundant genus identified in seawater and while it was detected in three blow samples (Bm023, Bm043, and Bm059), the relative abundance of this bacterial genus was very low. Using SourceTracker it was possible to verify that there was no contamination of *Herbaspirillum* spp. proceeding from the reagents in the laboratory during the 16S rRNA sequencing. Also, this genus is unlikely to have been detected due to procedural contamination because in the other blow samples *Herbaspirillum* spp. was not detected. Thus, the presence of this genera in the three samples is likely to reflect contamination with seawater.

## Core respiratory microbiome of the blue whale, *Balaenoptera musculus*

Domínguez-Sánchez C, Álvarez-Martínez RC, Gendron D, Acevedo-Whitehouse K

In our study, we were able to detect *Mycoplasma* spp. (34.4% relative abundance) in a single blue whale (sample Bm057). This genus, along with 22 other potentially pathogenic bacteria, has been identified in killer whales (Raverty *et al.*, 2017; Rhodes *et al.*, 2022). Having detected only one potentially pathogenic bacterial genus in this study could mean that blue whales are not commonly in contact with coastal areas where spillover of pathogens from humans or domestic animals could occur, unlike killer whales that live in areas where there is a large number of environmental stressors of human origin (Raverty *et al.*, 2017). However, a previous study reported *Entamoeba* spp., *Giardia* spp., and *Balantidium* spp., most likely from sewage discharge, in faeces of blue whales from this region (Pacheco-Armenta 2019), so it is plausible that rather than limited exposure, the presence of *Mycoplasma* in one individual reflects a suboptimal immune status or an underlying upper or lower respiratory condition, which could allow respiratory colonization of this pathogen. The presence of *Mycoplasma* spp. could be indicative of a transient bloom of this bacteria within the respiratory tract, or of an active respiratory infection, because these bacteria are typically present in the respiratory tract at a low abundance, but during active pathological processes, such as pneumonia and other respiratory conditions, their relative abundance increases (Dai *et al.*, 2018). Indeed, this opportunistic bacterial genera has been implicated in respiratory diseases of humans (Chandra *et al.*, 2015; Prince *et al.*, 2018; Qu *et al.*, 2018; Li *et al.*, 2019) and other mammals (Cai *et al.*, 2019; Choi *et al.*, 2019; Tao *et al.*, 2019). In marine mammals, *Mycoplasma* has been related to signs of respiratory disease and has been detected in the lungs of stranded harbour porpoises (*Phocoena phocoena*), Sowerby's beaked whale (*Mesoplodon bidens*) (Foster *et al.*, 2011) and California sea lions (*Zalophus californianus*)

## Core respiratory microbiome of the blue whale, *Balaenoptera musculus*

Domínguez-Sánchez C, Álvarez-Martínez RC, Gendron D, Acevedo-Whitehouse K

(Haulena *et al.*, 2013) during unusual mortality events. However, the role of *Mycoplasma* during episodes of disease in cetaceans, their host specificity, their diversity, and their association to cetacean stranding events, remains poorly understood (Foster *et al.*, 2011; Rhodes *et al.*, 2022). It is certainly possible that the whale from which sample Bm057 was collected, was experiencing a respiratory infection that involved *Mycoplasma*. Gaining clinical information that would allow us to establish this beyond any doubt is not feasible, but we propose that future studies consider using the presence of *Mycoplasma* in the blow as an indicator of suboptimal respiratory health.

It is important to note that the respiratory microbiome of the blue whales analysed in our study harboured bacteria that are commonly found in the oropharynx, nasopharynx and the mouth of different terrestrial mammals (German and Palmer, 2006; Guglielmetti *et al.*, 2010) in which those anatomical structures are interconnected in the upper respiratory tract. In contrast, cetaceans have no anatomical connection between the nasopharynx and the mouth (Apprill *et al.*, 2017; Smith *et al.*, 2017). This finding constitutes strong evidence that the core microbiome that we have described belongs to the respiratory system of blue whales and does not include their oral bacteria.

Given the current state of our oceans, which face habitat degradation, pollution, and other anthropogenic stressors (Melcón *et al.*, 2012; Mouton and Botha, 2012; Palmer *et al.*, 2022), suboptimal immune responses can occur in top-predator marine animals (Acevedo-Whitehouse and Duffus, 2009; Van Bresseem *et al.*, 2009; Hall *et al.*, 2018), in turn increasing

## **Core respiratory microbiome of the blue whale, *Balaenoptera musculus***

Domínguez-Sánchez C, Álvarez-Martínez RC, Gendron D, Acevedo-Whitehouse K

the risk of diseases in their populations (e.g. Sós *et al.*, 2013; Van Bressem *et al.*, 2014; Reisfeld *et al.*, 2019). In this sense, it is important to strengthen and expand efforts for health assessment of their populations (Gulland and Hall, 2007), efforts which to date include the determination of body condition by photogrammetry and measures of blubber thickness (e.g. Pettis *et al.*, 2004; Konishi *et al.*, 2008; Bradford *et al.*, 2012; Durban *et al.*, 2016), evaluation of skin integrity (Van Bressem *et al.*, 2015), and quantitation of specific gene transcripts in the skin (Simond *et al.*, 2019). In order to use the respiratory microbiome as a tool to help assess the health of large whales (Aprill *et al.*, 2017; Rhodes *et al.*, 2022), it is imperative to first increase our understanding of the core microbiome of the respiratory tract of different species, which is what our study has done for the Eastern North Pacific blue whale.

## **Conclusion**

Ours is the first study to characterize the microbiome of the respiratory tract in blue whales. We found that the blue whales sampled in the Gulf of California harboured a similar respiratory bacterial composition among individuals. Additionally, our richness and relative abundance results are comparable with those reported in the microbiome of healthy animals and humans, so we propose that the core respiratory microbiome identified here could be used as a baseline for future long-term studies aimed at identifying shifts in the composition and co-occurrence patterns of the respiratory microbiome and identify ASVs related to changes in body condition, as a proxy for poor health condition.

## Core respiratory microbiome of the blue whale, *Balaenoptera musculus*

Domínguez-Sánchez C, Álvarez-Martínez RC, Gendron D, Acevedo-Whitehouse K

### Materials and Methods

**Sample collection.** Using a small Phantom 3® quadcopter drone (DJI Innovations, China) with floaters and sterile Petri dishes (Domínguez-Sánchez *et al.*, 2018), we collected 17 blow samples from 17 individual blue whales sampled between February and March of 2016 and 2017 in Loreto Bay National Park (25°51'51''N, 111°07'18''O) within the Gulf of California, Mexico. The number of sampled whales represents 17% of the estimated 100 blue whales that reside during winter/spring in the southwestern Gulf of California (mark-recapture data from 1994-2006; Ugalde de la Cruz, 2006; SEMARNAT, 2018).

Each whale was photo-identified prior to collecting the samples (Gendron and Ugalde de la Cruz, 2012). The approach to the whale with the drone was made from the caudal fin heading towards the head to minimize disturbance and sampling was conducted at a height between 3 to 4 m above the blowhole (Domínguez-Sánchez *et al.*, 2018).

For each sample, the blow droplets were swabbed directly from the Petri dish using sterile cotton-tipped swabs. These were then transferred to a sterile 1.5 mL cryogenic microtube containing 500 µL of 96% molecular grade ethanol and kept frozen in a liquid nitrogen container until processing.

In addition to the blow samples, we collected environmental and technical controls. For this, we collected 1 ml of seawater at a depth of 0.10 m in the same location where we sampled the whales' blow. Two additional types of controls were collected but only one was used. Namely, we flew the drone with a sterile Petri dish attached and maintained the same altitude over the water and the same distance to the boat as we did when collecting the blow samples, but this was done in absence of any whale (this control was not included in this study because

## Core respiratory microbiome of the blue whale, *Balaenoptera musculus*

Domínguez-Sánchez C, Álvarez-Martínez RC, Gendron D, Acevedo-Whitehouse K

no bacterial DNA was detected in the sample). The second technical control was a human sneeze (ControlCADS), sampled from the person who collected and processed the samples.

**DNA extraction, PCR amplification and sequencing.** DNA was isolated from the swabs, seawater and environmental samples using the QIAamp ® DNA Mini Kit (QIAGEN, Germany). The primers used for sequencing the 16SrRNA V3 and V4 regions were 341F (5'-TCGTCGGCAGCGTCAGATGTGTATAAGAGACAG-[CCTACGGGNGGCWGCAG]) and 785R (5' GTCTCGTGGGCTCGGAGATGTGTATAAGAGACAG-[GACTACHVGGGTATCTAATCC]), which amplified a single product of approximately 460 bp (Thijs *et al.*, 2017). The Illumina overhang adapter sequences for the forward and reverse primers are the first 33 and 34 bp, respectively. The PCR program used an initial denaturation step at 95°C for 3 min; 25 cycles of 95°C for 30 s, 55°C for 30 s, and 72°C for 30s; and a final extension step at 72°C for 5 min. Each 25 µL-reaction contained 12.5 ng of extracted DNA, 5 µM of barcoded primers and 2x KAPA HiFi HotStart Ready Mix (KAPABIOSYSTEM, Cape Town, South Africa). We included one internal control (PCR blank) named ControlLab, as technical control. 1 µl of each sample was run on a 2100 Bioanalyzer (Agilent Technologies, CA, USA) with an Agilent DNA 1000 chip (Agilent Technologies, CA, USA) to verify amplicon size. AMPure XP beads (New England BioLabs, USA) were used to remove unused primers and primer dimer species. The PCR products were pooled into two libraries of equal concentrations. Amplicons were sequenced over 2-by 250-bp MiSeq at the Unit of Sequencing and Identification of Polymorphisms of the

## Core respiratory microbiome of the blue whale, *Balaenoptera musculus*

Domínguez-Sánchez C, Álvarez-Martínez RC, Gendron D, Acevedo-Whitehouse K

National Institute of Genomic Medicine (Instituto Nacional de Medicina Genómica, Unidad de Secuenciación e Identificación de Polimorfismos) in Mexico.

**16S rRNA Sequence data processing.** Quality control of the 379,813 raw sequences obtained was performed using the FASTQC pipeline available at the Galaxy web platform ([www.usegalaxy.com](http://www.usegalaxy.com)) [according to the creators' instructions](#) (Afgan *et al.*, 2018). This allowed us to obtain a quick impression of the data and avoid downstream problems. We used the Divisive Amplicon Denoising Algorithm 2 (*dada2*, v.1.9.1) (Callahan *et al.*, 2016), to infer exact amplicon sequence variants (ASVs) instead of the rough and less precise 16S rRNA OTU clustering approach (Callahan *et al.*, 2017; Dahan *et al.*, 2018) that groups the sequences with a 97% identity (Edgar, 2013; Edgar, 2017). Firstly, we filtered and trimmed the raw sequences (the quality score “Q” threshold to filter sequences was set at 25). Next, we combined all identical reads into unique sequences, determining the abundance that corresponded to the number of reads of each unique sequence. The forward and reverse reads for each sample were combined into a single merged *contig* sequence. After building the ASV table and removing chimeras (detected using self-referencing), sequences were classified and identified with *DECIPHER* (v.2.0) (Wright, 2016), using the SILVA rRNA sequence database (v.132) as the taxa reference (Quast *et al.*, 2013). We estimated the sampling coverage in blow samples and technical controls using Good’s coverage estimator (Zhauan 2017) with the QsRutils package (v.0.1.4). Finally, we classified and used *phyloseq* (v.1.25.0) (McMurdie and Holmes, 2013) to remove any sequence belonging to archaea, chloroplasts, and eukarya, as well as unknown sequences, and mitochondrial sequences.

## Core respiratory microbiome of the blue whale, *Balaenoptera musculus*

Domínguez-Sánchez C, Álvarez-Martínez RC, Gendron D, Acevedo-Whitehouse K

**Respiratory microbiome analysis.** To identify the common core of the respiratory microbiome, we used the ASVs, and taxonomy table generated with the *dada2* pipeline. Using *phyloseq* (v.1.25.0) (McMurdie and Holmes, 2013), we identified the distribution of reads counts from all the samples, as well as sampling coverage, plot rarefaction curves and the stacked barplot of Phyla to get a sense of the community composition in the samples. To achieve this, we pruned out low abundance taxa and only included those Phyla that contributed more than 0.02% of the relative abundance of each sample. Using *microbiome* (v.1.3.1) (Lahti *et al.*, 2017) we identified the common core microbiome (threshold detection = 0.2/100, prevalence = 50/100). We selected those values because we wanted a more conservative approach and did not want to take into account “rare bacteria” in the analysis. In addition, we analysed how the pattern of the common central microbiome changed based on a sliding prevalence range (5% - 100%) and four detection threshold values (0.001, 0.002, 0.01, and 0.02). With these criteria, a linear model could be built to determine the number of ASVs detected given a detection threshold value for a specific prevalence. We calculated alpha diversity: richness (*S*) and Simpson’s diversity index (*D*) with *vegan* (v.2.5.4) (Oksanen *et al.*, 2019). Alpha diversity measures were tested for deviations from normality with a Shapiro-Wilk test. To examine differences in alpha diversity metrics between the blow samples and controls we performed a Wilcoxon rank sum test. We also used *vegan* (v.2.5.4) to run the permutational multivariate ANOVA (PERMANOVA) on unweighted Unifrac distances to test for differences between the microbiome composition of blue whale blow samples and technical controls. We used SourceTracker (Knights *et al.*, 2013) to estimate the

## **Core respiratory microbiome of the blue whale, *Balaenoptera musculus***

Domínguez-Sánchez C, Álvarez-Martínez RC, Gendron D, Acevedo-Whitehouse K

proportion of the bacterial community in the blue whales' blows samples that comes from the set of technical controls. All graphs were rendered with *ggplot2* (Wickham, 2016).

**Ethics approval and consent to participate.** This study complied with the recommendations and methods for approaching blue whales provided by Mexican legislation (NOM-059-SEMARNAT-2010). All procedures were approved by the Bioethics committee of the Universidad Autónoma de Queretaro (Mexico) and sampling was conducted under permits SGPA/DGVS/00255/16 and SGPA/DGVS/01832/17 issued by the Dirección General de Vida Silvestre to D. Gendron.

**Acknowledgements.** We thank Manuel Antonio Zamarrón Nunez for his assistance during navigation, and Ana Sofia Merino, Aurora Paniagua, Madeleine Gauthier, Daniel Valdivia and Ricardo Mirsha Mata Cruz for their help during fieldwork. CADS was funded by a CONACYT PhD Studentship (558253). Fieldwork (sampling and navigation) was funded by The Instituto Politécnico Nacional (SIP20160496 and 2017014), Rufford Foundation 2<sup>nd</sup> small grant for Nature Conservation (2017), and the Program for the Conservation of Species at Risk (Programa de Conservación de Especies en Riesgo, Comisión Nacional de Áreas Naturales Protegidas). Molecular analysis was partly financed by a Small Grant in Aid of Research from the Society for Marine Mammalogy.

## **Competing interests**

The authors declare that they don't have competing interests.

## **Core respiratory microbiome of the blue whale, *Balaenoptera musculus***

Domínguez-Sánchez C, Álvarez-Martínez RC, Gendron D, Acevedo-Whitehouse K

### **Availability of data and materials**

The datasets used and analysed during the current study are available from the corresponding author upon reasonable request.

**Authors' contributions.** CAD collected the samples, performed molecular analyses, analysed the data, and drafted the manuscript. RCA conducted statistical programming for microbiome analysis and network construction and helped interpret results. DG conducted fieldwork, collected samples, and co-supervised the research. KAW conceived, designed, and supervised the research. All authors read and commented the final draft of the manuscript and gave approval for publication.

### **References**

- Acevedo-Whitehouse, K.A. and Duffus, A.L.J. (2009) Effects of environmental change on wildlife health. *Philos Trans R Soc B Biol Sci* 364: 3429–3438.
- Acevedo-Whitehouse, K.A., Rocha-Gosselin, A., and Gendron, D. (2010) A novel non-invasive tool for disease surveillance of free-ranging whales and its relevance to conservation programs. *Anim Conserv* 13: 217–225.
- Afgan, E., Baker, D., Batut, B., Van Den Beek, M., Bouvier, D., Ech, M., *et al.* (2018) The Galaxy platform for accessible, reproducible and collaborative biomedical analyses: 2018 update. *Nucleic Acids Res* 46: W537–W544.

## Core respiratory microbiome of the blue whale, *Balaenoptera musculus*

Domínguez-Sánchez C, Álvarez-Martínez RC, Gendron D, Acevedo-Whitehouse K

- Ahlgren, N.A., Perelman, J.N., Yeh, Y., and Fuhrman, J.A. (2019) Multi-year dynamics of fine-scale marine cyanobacterial populations are more strongly explained by phage interactions than abiotic, bottom-up factors. *Environ Microbiol* 22: 1801-1815.
- Ainsworth, T.D., Krause, L., Bridge, T., Torda, G., Raina, J.B., Zakrzewski, M., *et al.* (2015) The coral core microbiome identifies rare bacterial taxa as ubiquitous endosymbionts. *ISME Journal* 9: 2261-2274.
- Apprill, A., Miller, C.A., Moore, M.J., Durban, J.W., Fearnbach, H., and Barrett-Lennard, L.G. (2017) Extensive Core Microbiome in Drone-Captured Whale Blow Supports a Framework for Health Monitoring. *MSystems* 2: e00119-17.
- Apprill, A., Robbins, J., Eren, A., Pack, A., Reveillaud, J., Mattila, D., *et al.* (2014) Humpback whale populations share a core skin bacterial community: Towards a health index for marine mammals? *PLoS One* 9: e90785.
- Antwis, R.E., Lea, J.M.D., Unwin, B., and Shultz, S. (2018) Gut microbiome composition is associated with spatial structuring and social interactions in semi-feral Welsh Mountain ponies. *Microbiome* 6: 207.
- Astudillo-García, C., Bell, J.J., Webster, N.S., Glasl, B., Jompa, J., Montoya, J.M. *et al.* (2017) Evaluating the core microbiota in complex communities: A systemic investigation. *Environ Microbiol* 19: 1450-1462.
- Bell, T., Newman, J.A., Silverman, B.W., Turner, S.L., and Lilley, A.K. (2005) The contribution of species richness and composition to bacterial services. *Nature* 436: 1157–1160.

## Core respiratory microbiome of the blue whale, *Balaenoptera musculus*

Domínguez-Sánchez C, Álvarez-Martínez RC, Gendron D, Acevedo-Whitehouse K

- Bierlich, K.C., Miller, C., DeForce, E., Friedlaender, A.S., Johnston, D.W., and Apprill, A. (2018) Temporal and regional variability in the skin microbiome of humpback whales along the Western Antarctic Peninsula. *Appl. Environ. Microbiol* 86: e02574-17.
- Bik, E.M., Costello, E.K., Switzer, A.D., Callahan, B.J., Holmes, S.P., Wells, R.S., *et al.* (2016) Marine mammals harbor unique microbiotas shaped by and yet distinct from the sea. *Nat Commun* 7: 1–13.
- Björk, J.R., O’Hara, R.B., Ribes, M., Coma, R., and Montoya, J.M. (2018) The dynamic core microbiome: Structure, dynamics and stability. *bioRxiv*: 137885
- Bohus, V., Kéki, Z., Márialigeti, K., Baranyi, K., Patek, G., Schunk, J., and Tóth, E. (2011) Bacterial communities in an ultrapure water containing storage tank of a power plant. *Acta Microbiol Immunol Hung* 58: 371–382.
- Bradford, A.L., Weller, D.W., Punt, A.E., Ivashchenko, Y.V., Burdin, A.M., VanBlaricom, G.R., *et al.* (2012) Leaner leviathans: body condition variation in a critically endangered whale population. *J mammal* 93: 251-266.
- Byrd, A.L., Belkaid, Y., and Segre, J.A. (2018) The human skin microbiome. *Nat Rev Microbiol* 16: 143–155.
- Cai, H.Y., McDowall, R., Parker, L., Kaufman, E.I., and Caswell, J.L. (2019) Changes in antimicrobial susceptibility profiles of *Mycoplasma bovis* over time. *Can J Vet Res* 1: 34–41.
- Callahan, B.J., McMurdie, P.J., and Holmes, S.P. (2017) Exact sequence variants should replace operational taxonomic units in marker-gene data analysis. *ISME J* 11: 2639–2643.

## Core respiratory microbiome of the blue whale, *Balaenoptera musculus*

Domínguez-Sánchez C, Álvarez-Martínez RC, Gendron D, Acevedo-Whitehouse K

Callahan, B.J., McMurdie, P.J., Rosen, M.J., Han, A.W., Johnson, A.J.A., and Holmes, S.P. (2016) DADA2: High-resolution sample inference from Illumina amplicon data. *Nat Methods* 13: 581–583.

Chaban, B., Albert, A., Links, M.G., Gardy, J.L., Tang, P., and Hill, J.E. (2013) Characterization of the Upper Respiratory Tract Microbiomes of Patients with Pandemic H1N1 Influenza. *PLoS One* 8: e69559.

Chan, Y.K., Estaki, M., and Gibson, D.L. (2013) Clinical consequences of diet-induced dysbiosis. *Ann Nutr Metab* 63: 28–40.

Chandra, S., Diggins, D., Hughes, S., Lye, L., Preston, V., Rush, M., *et al.* (2015) Autonomous Vehicles for Remote Sample Collection in Difficult Conditions. 2015 IEEE Int Conf Technol Pract Robot Appl 2.

Charlson, E.S., Bittinger, K., Chen, J., Diamond, J.M., Li, H., Collman, R.G., and Bushman, F.D. (2012) Assessing Bacterial Populations in the Lung by Replicate Analysis of Samples from the Upper and Lower Respiratory Tracts. *PLoS One* 7: e42786.

Chiarello, M., Villéger, S., Bouvier, C., Auguet, J.C., and Bouvier, T. (2017) Captive bottlenose dolphins and killer whales harbor a species-specific skin microbiota that varies among individuals. *Sci Rep* 7: 15269.

Choi, W., Yang, A.X., Waltenburg, M.A., Choe, S., Steiner, M., Radwan, A., *et al.* (2019) FOXA2 depletion leads to mucus hypersecretion in canine airways with respiratory diseases. *Cell Microbiol* 21: e12957.

## Core respiratory microbiome of the blue whale, *Balaenoptera musculus*

Domínguez-Sánchez C, Álvarez-Martínez RC, Gendron D, Acevedo-Whitehouse K

- Coyte, K.Z., Rao, C., Rakoff-Nahoum, S., and Foster, K. (2019) Community assembly in the microbiome: ecological insights into infant microbiome development. *Access Microbiology* 1: 241-250.
- Coyte, K.Z. and Rakoff-Nahoum, S. (2019) Understanding Competition and Cooperation within the Mammalian Gut Microbiome. *Current Biol* 29: R538-R544.
- Cui, L., Morris, A., Huang, L., Beck, J.M., Twigg, H.L., von Mutius, E., and Ghedin, E. (2014) The Microbiome and the Lung. *Ann Am Thorac Soc* 11: S227–S232.
- Dahan, D., Jude, B.A., Lamendella, R., Keesing, F., and Perron, G.G. (2018) Exposure to arsenic alters the microbiome of larval zebrafish. *Front Microbiol* 9: 1–12.
- Dai, W., Wang, H., Zhou, Q., Feng, X., Lu, Z., Li, D., *et al.* (2018) The concordance between upper and lower respiratory microbiota in children with *Mycoplasma pneumoniae* pneumonia. *Emerg Microbes Infect* 7: 92.
- Dickson, R.P., Erb-Downward, J.R., and Huffnagle, G.B. (2014) Towards an Ecology of the Lung: New Conceptual Models of Pulmonary Microbiology and Pneumonia Pathogenesis. *Lancet Respir Med* 2: 238–246.
- Dickson, R.P., Erb-Downward, J.R., Martinez, F.J., and Huffnagle, G.B. (2016) The Microbiome and the Respiratory Tract. *Annu Rev Physiol* 78: 7.1-7.24.
- Dickson, R.P., Martinez, F.J., and Huffnagle, G.B. (2014) The Role of the Microbiome in Exacerbations of Chronic Lung Diseases. *Lancet* 384: 691–702.
- Dinsdale, E.A., Edwards, R.A., Hall, D., Angly, F., Breitbart, M., Brulc, J.M., *et al.* (2008) Functional metagenomics profiling of nine biomes. *Nature* 452: 629-632.

## Core respiratory microbiome of the blue whale, *Balaenoptera musculus*

Domínguez-Sánchez C, Álvarez-Martínez RC, Gendron D, Acevedo-Whitehouse K

- Dobritsa, A.P., Reddy, M.C.S., and Samadpour, M. (2010) Reclassification of *Herbaspirillum putei* as a later heterotypic synonym of *Herbaspirillum huttiense*, with the description of *H. huttiense* subsp. *huttiense* subsp. nov. and *H. huttiense* subsp. *putei* subsp. nov., comb. nov., and description of *Herbaspirillum aquaticum* sp. nov. *Int J Syst Evol Microbiol* 60: 1418–1426.
- Domínguez-Sánchez, C.A., Acevedo-Whitehouse, K.A., Gendron, D., and Hoo (2018) Effect of drone-based blow sampling on blue whale (*Balaenoptera musculus*) behavior. *Mar Mammal Sci* 34: 841–850.
- Durban, J.W., Moore, M.J., Chiang, G., Hickmott, L.S., Bocconcelli, A., Howes, G., *et al.* (2016) Photogrammetry of blue whales with an unmanned hexacopter. *Mar Mammal Sci* 32: 1510-1515.
- Edgar, R.C. (2013) UPARSE: Highly accurate OTU sequences from microbial amplicon reads. *Nat Methods* 10: 996–998.
- Edgar, R.C. (2017) Updating the 97% identity threshold for 16S ribosomal RNA OTUs. *bioRxiv* 192211.
- Eloe-Fadrosh, E.A., and Rasko, D.A. (2013) The Human Microbiome : From Symbiosis to Pathogenesis. *Annu Rev Med* 64: 145–163.
- Erb-Downward, J.R., Thompson, D.L., Han, M.K., Freeman, C.M., McCloskey, L., Schmidt, L.A., *et al.* (2011) Analysis of the Lung Microbiome in the “Healthy” Smoker and in COPD. *PLoS One* 6: e16384.

## Core respiratory microbiome of the blue whale, *Balaenoptera musculus*

Domínguez-Sánchez C, Álvarez-Martínez RC, Gendron D, Acevedo-Whitehouse K

- Eren, A.M., Morrison, H.G., Lescault, P.J., Reveillaud, J., Vineis, J.H., and Sogin, M.L. (2015) Minimum entropy decomposition: Unsupervised oligotyping for sensitive partitioning of high-throughput marker gene sequences. *ISME J* 9: 968-979.
- Foster, G., McAuliffe, L., Dagleish, M.P., Barley, J., Howie, F., Nicholas, R.A.J., and Ayling, R.D. (2011) *Mycoplasma* Species Isolated from Harbor Porpoises (*Phocoena phocoena*) and a Sowerby's Beaked Whale (*Mesoplodon bidens*) Stranded in Scottish Waters. *J Wildl Dis* 47: 206–211.
- Foster, K.R., Schluter, J., Coyte, K.Z., and Rakoff-Nahoum, S. (2017) The evolution of the host microbiome as an ecosystem on a leash. *Nature* 548: 43–51.
- Gagliardi, A., Totino, V., Cacciotti, F., Iebba, V., Neroni, B., Bonfiglio, G., *et al.* (2018) Rebuilding the Gut Microbiota Ecosystem. *Int J Environ Res Public Health* 15: e1679.
- Gendron, D., and Ugalde de la Cruz, A. (2012) A new classification method to simplify blue whale photo-identification technique. *J Cetacean Resour Manag* 12: 79–84.
- German, R.Z., and Palmer, J.B. (2006) Anatomy and development of oral cavity and pharynx. *GI Motility online* 1–8.
- Gibson, K.M., Nguyen, B.N., Neumann, L.M., Miller, M., Buss, P., Daniels, S., *et al.* (2019). Gut microbiome differences between wild and captive black rhinoceros - implications for rhino health. *Sci Rep* 9:7570.
- Glendinning, L., McLachlan, G., and Vervelde, L. (2017) Age-related differences in the respiratory microbiota of chickens. *PLoS One* 12: e0188455.
- Glendinning, L., Wright, S., Pollock, J., Tennant, P., and Collie, D. (2016) Variability of the Sheep Lung Microbiota. *Appl Environ Microbiol* 82: 3225–3238.

## Core respiratory microbiome of the blue whale, *Balaenoptera musculus*

Domínguez-Sánchez C, Álvarez-Martínez RC, Gendron D, Acevedo-Whitehouse K

- Grahn, N., Olofsson, M., Ellnebo-Svedlund, K., Monstein, H.J., and Jonasson, J. (2003) Identification of mixed bacterial DNA contamination in broad-range PCR amplification of 16S rDNA V1 and V3 variable regions by pyrosequencing of cloned amplicons. *FEMS Microbiol Lett* 219: 87–91.
- Grice, E.A., and Segre, J.A. (2011) The skin microbiome. *Nat Rev Microbiol* 9: 244–253.
- Guglielmetti, S., Taverniti, V., Minuzzo, M., Arioli, S., Stuknyte, M., Karp, M., and Mora, D. (2010) Oral bacteria as potential probiotics for the pharyngeal mucosa. *Appl Environ Microbiol* 76: 3948–3958.
- Gulland, F., and Hall, A. (2007) Is marine mammal health deteriorating? Trends in the global reporting of marine mammal disease. *EcoHealth* 4: 135-150.
- Haegeman, B., Hamelin, J., Moriarty, J., Neal, P., Dushoff, J., and Weitz, J.S. (2013) Robust estimation of microbial diversity in theory and in practice. *ISME J* 7: 1092–1101.
- Haulena, M., Gulland, F.M.D., Lawrence, J.A., Fauquier, D.A., Jang, S., Aldridge, B., *et al.* (2013) Lesions Associated With a Novel *Mycoplasma* Sp. in California Sea Lions (*Zalophus Californianus*) Undergoing Rehabilitation. *J Wildl Dis* 42: 40–45.
- Hernandez-Agreda, A., Gates, R.D., and Ainsworth, T.D. (2017) Defining the Core Microbiome in Corals' Microbial Soup. *Trends Microbiol* 25: 125-140.
- Hilty, M., Burke, C., Pedro, H., Cardenas, P., Bush, A., Bossley, C., *et al.* (2010) Disordered Microbial Communities in Asthmatic Airways. *PLoS One* 5: e8578.
- Hooper, R., Brealey, J.C., van der Valk, T., Alberdi, A., Durban, J.W., Fearnbach, H., *et al.* (2018) Host-derived population genomics data provides insights into bacterial and diatom composition of the killer whale skin. *Mol Ecol* 1–19.

## Core respiratory microbiome of the blue whale, *Balaenoptera musculus*

Domínguez-Sánchez C, Álvarez-Martínez RC, Gendron D, Acevedo-Whitehouse K

Huang, Y.J., Charlson, E.S., Collman, R.G., Colombini-Hatch, S., Martinez, F.D., and Senior, R.M. (2013) The role of the lung microbiome in health and disease: A national heart, lung, and blood institute workshop report. *Am J Respir Crit Care Med* 187: 1382–1387.

Huang, Y.J., Yang, B., and Li, W. (2016) Defining the normal core microbiome of conjunctival microbial communities. *Clin. Microbiol. Infect* 7: e643.e7-643.e12

Huffnagle, G.B., Dickson, R.P., and Lukacs, N.W. (2017) The respiratory tract microbiome and lung inflammation: A two-way street. *Mucosal. Immunol* 10: 299–306.

Huse, S.M., Ye, hou, Y., and Fodor, A.A. (2012) A Core Human Microbiome as Viewed through 16S rRNA Sequence. *PLoS one*: e34242.

Infante-Villamil, S., Huerlimann, R., and Jerry, D.R. (2020) Microbiome diversity and dysbiosis in aquaculture. *Rev Aquac* 13: 1077-1096.

Ingala, M.R., Simmons, N.B., Wultsch, C., Krampis, K., Speer, K.A., and Perkins, S.L. (2018) Comparing Microbiome Sampling Methods in a Wild Mammal: Fecal and Intestinal Samples Record Different Signals of Host Ecology, Evolution. *Front. Microbiol* 9: 803.

Jiménez, R.R., Alvarado, G., Estrella, J., and Sommer, S. (2019) Moving Beyond the Host: Unraveling the Skin Microbiome of Endangered Costa Rican Amphibians. *Front Microbiol* 10:2060.

Johnson, K.V.A., and Burnet, P.W.J. (2016) Microbiome: Should we diversify from diversity? *Gut Microbes* 7: 455–458.

## Core respiratory microbiome of the blue whale, *Balaenoptera musculus*

Domínguez-Sánchez C, Álvarez-Martínez RC, Gendron D, Acevedo-Whitehouse K

- Johnson, W.R., Torralba, M., Fair, P.A., Bossart, G.D., Nelson, K.E., and Morris, P.J. (2009) Novel diversity of bacterial communities associated with bottlenose dolphin upper respiratory tracts. *Environ Microbiol Rep* 1: 555–562.
- Jousset, A., Bienhold, C., Chatzinotas, A., Gallien, L., Gobet, A., Kurm, V., and Küsel, K. (2017) Where less may be more: how the rare biosphere pulls ecosystems strings. *ISME Journal* 11: 853-862
- Kéki, Z., Grébner, K., Bohus, V., Márialigeti, K., and Tóth, E. (2013) Application of special oligotrophic media for cultivation of bacterial communities originated from ultrapure
- Knights, D., Kuczynski, J., Charlson, E.S., Zaneveld, J., Mozer, M.C., Collman, R.G., *et al.* (2013) Bayesian community-wide culture-independent microbial source tracking. *Nat Methods* 8: 761–763.
- Konishi, K., Tamura, T., Zenitani, R., Bando, T., Kato, H., and Walløe, L. (2008) Decline in energy storage in the Antarctic minke whale (*Balaenoptera bonaerensis*) in the Southern Ocean. *Polar Biol* 31: 1509-1520.
- Lahti, L., Shetty, S., Blake, T., and Salajarvi, J. (2017) Tools for microbiome analysis in R.
- Lee, Y.K., and Mazmanian, S.K. (2010) Has the microbiota played a critical role in the evolution of the adaptive immune system?. *Science* 330: 1768–1773.
- Lemon, K.P., Klepac-Ceraj, V., Schiffer, H.K., Brodie, E.L., Lynch, S.V., and Kolter, R. (2010) Comparative Analyses of the Bacterial Microbiota of the Human Nostril and Oropharynx. *mBio* 1: e00129-10.

## Core respiratory microbiome of the blue whale, *Balaenoptera musculus*

Domínguez-Sánchez C, Álvarez-Martínez RC, Gendron D, Acevedo-Whitehouse K

- Li, S., Xue, G., Zhao, H., Feng, Y., Yan, C., Cui, J., and Sun, H. (2019) The Mycoplasma pneumonia HapE protein alters the cytokine profile and growth of human bronchial epithelial cells. Biosci Rep 39: BSR20182201.
- Lima, N., Rogers, T., Acevedo-Whitehouse, K.A., and Brown, M.V. (2012) Temporal stability and species specificity in bacteria associated with the bottlenose dolphins respiratory system. Environ Microbiol Rep 4: 89–96.
- Lima, S.F., Teixeira, A.G. V., Higgins, C.H., Lima, F.S., and Bicalho, R.C. (2016) The upper respiratory tract microbiome and its potential role in bovine respiratory disease and otitis media. Sci Rep 6: 1–12.
- Mackenzie, B.W., Waite, D.W., Hoggard, M., Taylor, M.W., Biswas, K., and Douglas, R.G. (2017) Moving beyond descriptions of diversity : clinical and research implications of bacterial imbalance in chronic rhinosinusitis. Rhinology 55: 291–297.
- Man, W.H., De Steenhuijsen Piters, W.A.A., and Bogaert, D. (2017) The microbiota of the respiratory tract: Gatekeeper to respiratory health. Nat Rev Microbiol 15: 259–270.
- McMurdie, P.J., and Holmes, S. (2013) Phyloseq: An R Package for Reproducible Interactive Analysis and Graphics of Microbiome Census Data. PLoS One 8: e61217.
- Melcón, M.L., Cummins, A.J., Kerosky, S.M., Roche, L.K., Wiggins, S.M., and Hildebrand, J.A. (2012) Blue Whales Respond to Anthropogenic Noise. PLoS One 7: 32681.
- Mohammadi, T., Reesink, H.W., Vandenbroucke-Grauls, C.M.J.E., and Savelkoul, P.H.M. (2005) Removal of contaminating DNA from commercial nucleic acid extraction kit reagents. J Microbiol Methods 61: 285–288.

## Core respiratory microbiome of the blue whale, *Balaenoptera musculus*

Domínguez-Sánchez C, Álvarez-Martínez RC, Gendron D, Acevedo-Whitehouse K

- Moore, S.E., Haug, T., Vikingsson, G.A., and Stenson, G.B. (2019) Baleen whale ecology in arctic and subarctic seas in an era of rapid habitat alteration. *Progress in Oceanography* 176: 102118.
- Morris, A., Beck, J.M., Schloss, P.D., Campbell, T.B., Crothers, K., Curtis, J.L., *et al.* (2013) Comparison of the Respiratory Microbiome in Healthy Nonsmokers and Smokers. *Am J Respir Crit Care Med* 187: 1067–1075.
- Mouton, M., and Botha, A. (2012) Cutaneous lesions in cetaceans: An indicator of ecosystem status? In, Romero, A. and Keith, E.O. (eds), *New Approaches to the Study of Marine Mammals*. Croatia: InTech, pp. 123–144.
- Nelson, T.M., Apprill, A., Mann, J., Rogers, T.L., and Brown, M. V. (2015) The marine mammal microbiome: current knowledge and future directions. *Microbiol Aust Focus* 36: 8-13.
- Olufunmilola, I., McGuinness, L.R., Lu, S., Wang, Y., Hussain, S., Weisel, C.P., and Kerkhof, L.J. (2020) Species-level evaluation of the human respiratory microbiome. *Giga Sci* 9: 1-10
- Oksanen, J., Blanchet, G., Friendly, M., Kindt, R., Legendre, P., McGlinn, D., *et al.* (2019) *vegan: Community Ecology Package*.
- Ozkan, J., Nielsen, S., Diez-Vives, C., Coroneo, M., Thomas, T., and Willcox, M. (2017) Temporal Stability and Composition of the Ocular Surface Microbiome. *Scientific Reports* 7: e9880
- Pacheco-Armenta, M.J. (2019) Identificación morfológica y molecular de endoparásitos de la ballena azul (*Balaenoptera musculus*) de vida libre en el suroeste del Golfo de

## Core respiratory microbiome of the blue whale, *Balaenoptera musculus*

Domínguez-Sánchez C, Álvarez-Martínez RC, Gendron D, Acevedo-Whitehouse K

California. MSc Thesis. Centro Interdisciplinario de Ciencias Marinas, Instituto Politécnico Nacional. Mexico.

Palmer, E., Alexander, A., Liggins, L., Guerra, M., Bury, S., Hendriks, H., Stockin, K., and Peters, K. (2022). A piece of the puzzle: analyses of recent strandings and historical records reveal new genetic and ecological insights on New Zealand sperm whales. *Mar Ecol Prog Ser* 690: 201-2017.

Pedrós-Alió, C. (2012) The Rare Bacterial Biosphere. *Ann Rev Mar Sci* 4: 449–466.

Pershing, A.J., Christensen, L.B., Record, N.R., Sherwood, G.D., and Stetson, P.B. (2010) The impact of whaling on the ocean carbon cycle: Why bigger was better. *PLoS One* 5: e12444.

Pettis, H.M., Rolland, R.M., Hamilton, P.K., Brault, S., Knowlton, A.R., and Kraus, S.D. (2004) Visual health assessment of North Atlantic right whales (*Eubalaena glacialis*) using photographs. *Can J Zool* 82: 8-19.

Prince, O.A., Krunkosky, T.M., Sheppard, E.S., and Krause, D.C. (2018) Modelling persistent *Mycoplasma pneumoniae* infection of human airway epithelium. *Cell Microbiol* 20: e12810.

Qu, J., Yang, C., Bao, F., Chen, S., Gu, L., and Cao, B. (2018) Epidemiological characterization of respiratory tract infections caused by *Mycoplasma pneumoniae* during epidemic and post-epidemic periods in North China, from 2011 to 2016. *BMC Infect Dis* 18: 335.

## Core respiratory microbiome of the blue whale, *Balaenoptera musculus*

Domínguez-Sánchez C, Álvarez-Martínez RC, Gendron D, Acevedo-Whitehouse K

- Quast, C., Pruesse, E., Yilmaz, P., Gerken, J., Schweer, T., Yarza, P., *et al.* (2013) The SILVA ribosomal RNA gene database project: improved data processing and web-based tools. *Nucleic Acids Res* 41: D590–D596.
- Raverty, S.A., Rhodes, L.D., Zabek, E., Eshghi, A., Cameron, C.E., Hanson, M.B., and Schroeder, J.P. (2017) Respiratory Microbiome of Endangered Southern Resident Killer Whales and Microbiota of Surrounding Sea Surface Microlayer in the Eastern North Pacific. *Sci Rep* 7: 1–12.
- Reisfeld, L., Sacristán, C., Canedo, P., Schwarz, B., Ewbank, A.C., Esperón, F., *et al.* (2019) Fusariosis in a Captive South American Sea Lion (*Otaria flavescens*): A Case Report. *Mycopathologia* 184: 187-192.
- Rhodes, L.D., Emmons, C.K., Wisswaesser, G.S., Wells, A.H., and Hanson, M.B. (2022) Bacterial microbiomes from mucus and breath of southern resident killer whales (*Orcinus orca*). *Con phys* 10: 10.1093.
- Risely, A. (2020) Applying the core microbiome to understand host-microbe systems. *J Anim Ecol* 0:1-10
- Ross, A.A., Rodrigues, A., and Neufeld, J.D. (2019) The skin microbiome of vertebrates. *Microbiome* 7: 1-14.
- Salter, S.J., Cox, M.J., Turek, E.M., Calus, S.T., Cookson, W.O., Moffatt, M.F., *et al.* (2014) Reagent and laboratory contamination can critically impact sequence-based microbiome analyses. *BMC Biol* 12: 87.

# **Core respiratory microbiome of the blue whale, *Balaenoptera musculus***

Domínguez-Sánchez C, Álvarez-Martínez RC, Gendron D, Acevedo-Whitehouse K

Santacroe, L., Charitos, I.A., Ballini, A., Inchingolo, F., Luperto, P., De Nitto, E., and Topi, S. (2020). The Human Respiratory System and its Microbiome at a Glimpse. *Biology* 9: 318-

Schlaeppli, K., Dombrowski, N., Oter, R.G., Ver Loren Van Themaat, E., and Schulze-Lefert, P. (2014) Quantitative divergence of the bacterial root microbiota in *Arabidopsis thaliana* relatives. *PNAS* 111: 585-592.

Sehnal, L., Brammer-Robbins, E., Wormington, A.M., Blaha, L., Bisesi, J., Larkin, I. et al. 2021. Microbiome Composition and Function in Aquatic Vertebrates: Small Organisms Making Big Impacts on Aquatic Animal Health. *Front. Microbiol* 12:567408.

Shade, A., and Handelsman, J. (2012) Beyond the Venn diagram: The hunt for a core microbiome. *Environ Microbiol* 14: 4–12.

Shreiner, A.B., Kao, J.Y., and Young, V.B. (2015) The gut microbiome in health and in disease. *Curr Opin Gastroenterol* 31: 69–75.

Simond, A.E., Houde, M., Lesage, V., Michaud, R., Zbinden, D., and Verreault, J. (2019) Associations between organohalogen exposure and thyroid- and steroid-related gene responses in St. Lawrence Estuary belugas and minke whales. *Mar Pollut Bull* 145: 174-184.

Skopina, M.Y., Vasileva, A.A., Pershina, E.V., and Pinevich, A.V. (2016) Diversity at low abundance: The phenomenon of the rare bacterial biosphere. *Microbiology* 85: 272–282.

## Core respiratory microbiome of the blue whale, *Balaenoptera musculus*

Domínguez-Sánchez C, Álvarez-Martínez RC, Gendron D, Acevedo-Whitehouse K

- Smith, C.M., Tang, C.Y., and Reidenberg, J.S. (2017) Visualizing the Anatomy and Position of the Larynx in Balaenopterid Whales. *Faseb J* 31: 392-393.
- Sós, E., Molnár, V., Lajos, Z., Koroknal, V., and Gál, J. (2013) Successfully treated dermatomycosis in california sea lions (*Zalophus californianus*). *J Zoo Wildlife Med* 44: 462-465.
- Soverini, M., Quercia, S., Biancani, B., Furlati, S., Turrone, S., Biagi, E., *et al.* (2016) The bottlenose dolphin (*Tursiops truncatus*) faecal microbiota. *FEMS Microbiol Ecol* 92: 1–8.
- Stubbendieck, R.M., Vargas-Bautista, C., and Straight, P.D. (2016) Bacterial communities: Interactions to scale. *Front Microbiol* 7: 1–19.
- Tao, Y., Shu, J., Chen, J., Wu, Y., and He, Y. (2019) A concise review of vaccines against *Mycoplasma hyopneumoniae*. *Res Vet Sci* 123: 144–152.
- The Human Microbiome Project Consortium (2012) Structure, function and diversity of the healthy human microbiome. *Nature* 486: 207–214.
- Thijs, S., De Beeck, M.O., Beckers, B., Truyens, S., Stevens, V., Van Hamme, J.D. *et al.* (2017) Comparative evaluation of four bacteria-specific primer pairs for 16S rRNA gene surveys. *Front Microbiol* 8: 494.
- Thomas, S., Izard, J., Walh, E., Batich, K., Chongsathidkiet, P., Clarke, G. *et al.* (2017) The host microbiome regulates and maintains human health: A primer and perspective for non-microbiologist. *Cancer Res* 77: 1783-1812.

## Core respiratory microbiome of the blue whale, *Balaenoptera musculus*

Domínguez-Sánchez C, Álvarez-Martínez RC, Gendron D, Acevedo-Whitehouse K

- Tress, B., Dorn, E.S., Suchodolski, J.S., Nisar, T., Ravindran, P., Weber, K., *et al.* (2017) Bacterial microbiome of the nose of healthy dogs and dogs with nasal disease. PLoS One 12: e0176736.
- Van der Gast, C.J., Walker, A.W., Stressmann, F.A., Rogers, G.B., Scott, P., Daniels, T.W. *et al.* (2011). Partitioning core and satellite taxa from within cystic fibrosis lung bacterial communities. ISME J 5: 780–791.
- Van Treuren, W., and Dodd, D. (2019) Microbial Contribution to the Human Metabolome: Implications for Health and Disease. Annu Rev Pathol 15:345–369
- Venn-Watson, S., Smith, C.R., and Jensen, E.D. (2008) Primary bacterial pathogens in bottlenose dolphins *Tursiops truncatus*: Needles in haystacks of commensal and environmental microbes. Dis Aquat Organ 79: 87–93.
- Watkins, C.A., Gaines, T., Strathdee, F., Baili, J., Watson, E., Hall, A. *et al.* (2022). A comparative study of the fecal microbiota of gray seal pups and yearlings – a marine mammal sentinel species. Microbiol Open: e1281
- Wickham, H. (2016) Elegant Graphics for Data Analysis. Springer New York
- Willis, A., Bunge, J., and Whitman, T. (2017) Improved detection of changes in species richness in high diversity microbial communities. J R Stat Soc Ser C Appl Stat 66: 963–977.
- Willis, K.A., Pierre, J.F., Cormier, S.A., and Talati, A.J. (2020) Mice without a microbiome are partially protected from lung injury by hiperoxia. Am J Physiol Lung Cell Mol Physiol 318: L419-L420.

# **Core respiratory microbiome of the blue whale, *Balaenoptera musculus***

Domínguez-Sánchez C, Álvarez-Martínez RC, Gendron D, Acevedo-Whitehouse K

Worthing, K.A., Abraham, S., Coombs, G.W., Pang, S., Saputra, S., Jordan, D., *et al.* (2018)

Clonal diversity and geographic distribution of methicillin-resistant *Staphylococcus pseudintermedius* from Australian animals: Discovery of novel sequence types. Vet Microbiol 213: 58–65.

Wright, E.S. (2016) Using DECIPHER v2.0 to Analyze Big Biological Sequence Data in R. R J 8: 352–359.

Yamamoto, S., Saito, M., Tamura, A., Prawisuda, D., Mizutani, T., and Yotsuyanagi, H. (2021) The human microbiome and COVID-19: A Systematic review. PLoS One 10.1371

Yi, H., Yong, D., Lee, K., Cho, Y., and Chun, J. (2014) Profiling bacterial community in upper respiratory tracts. BMC Infect Dis 14: 1–10.

Zaura, E., Keijser, B.J.F., Huse, S.M., and Crielaard, W. (2009) Defining the healthy ‘core microbiome’ of oral micro- bial communities. BMC Microbiol 9: 259.

Zhauan, B., Penton, C.R., Xue, C., Quensen, J.F., Roley, S.S, Gou, J., *et al.* (2017) Soil depth and crop determinants of bacterial communities under ten biofuel cropping systems. Soil Biol 112: 140-152.

## Core respiratory microbiome of the blue whale, *Balaenoptera musculus*

Domínguez-Sánchez C, Álvarez-Martínez RC, Gendron D, Acevedo-Whitehouse K

**Table 1.** Taxonomic classification of the eighteen ASVs that make up the core microbiome of the respiratory tract of the blue whale.

| Domain   | Phylum         | Class                 | Order               | Family               | Genus                  | Species      |
|----------|----------------|-----------------------|---------------------|----------------------|------------------------|--------------|
| Bacteria | Actinobacteria | Actinobacteria        | Propionibacteriales | Propionibacteriaceae | <i>Cutibacterium</i>   | unclassified |
| Bacteria | Fusobacteria   | Fusobacteriia         | Fusobacteriales     | Leptotrichiaceae     | <i>Oceanivirga</i>     | unclassified |
| Bacteria | Firmicutes     | Erysipelotrichia      | Erysipelotrichales  | Erysipelotrichaceae  | <i>Dielma</i>          | unclassified |
| Bacteria | Fusobacteria   | Fusobacteriia         | Fusobacteriales     | Leptotrichiaceae     | <i>Oceanivirga</i>     | unclassified |
| Bacteria | Proteobacteria | Gammaproteobacteria   | Pseudomonadales     | Moraxellaceae        | <i>Moraxella</i>       | unclassified |
| Bacteria | Proteobacteria | Gammaproteobacteria   | Pseudomonadales     | Moraxellaceae        | <i>Moraxella</i>       | unclassified |
| Bacteria | Proteobacteria | Gammaproteobacteria   | Pseudomonadales     | Moraxellaceae        | <i>Moraxella</i>       | unclassified |
| Bacteria | Bacteroidetes  | Bacteroidia           | Bacteroidales       | Porphyromonadaceae   | <i>Porphyromonas</i>   | unclassified |
| Bacteria | Bacteroidetes  | Bacteroidia           | Bacteroidales       | Prevotellaceae       | <i>Alloprevotella</i>  | unclassified |
| Bacteria | Fusobacteria   | Fusobacteriia         | Fusobacteriales     | Leptotrichiaceae     | <i>unclassified</i>    | unclassified |
| Bacteria | Fusobacteria   | Fusobacteriia         | Fusobacteriales     | Leptotrichiaceae     | <i>Oceanivirga</i>     | unclassified |
| Bacteria | Proteobacteria | Epsilonproteobacteria | Campylobacteriales  | Campylobacteraceae   | <i>Arcobacter</i>      | unclassified |
| Bacteria | Bacteroidetes  | Bacteroidia           | Bacteroidales       | Porphyromonadaceae   | <i>Porphyromonas</i>   | unclassified |
| Bacteria | Firmicutes     | Clostridia            | Clostridiales       | Lachnospiraceae      | <i>Natronaerovirga</i> | unclassified |
| Bacteria | Proteobacteria | Gammaproteobacteria   | Cardiobacteriales   | Cardiobacteriaceae   | <i>Suttonella</i>      | unclassified |
| Bacteria | Bacteroidetes  | Bacteroidia           | Bacteroidales       | Porphyromonadaceae   | <i>Porphyromonas</i>   | unclassified |
| Bacteria | Firmicutes     | Clostridia            | Clostridiales       | Lachnospiraceae      | <i>Natronaerovirga</i> | unclassified |
| Bacteria | Bacteroidetes  | Flavobacteriia        | Flavobacteriales    | Flavobacteriaceae    | <i>Tenacibaculum</i>   | unclassified |

## Core respiratory microbiome of the blue whale, *Balaenoptera musculus*

Domínguez-Sánchez C, Álvarez-Martínez RC, Gendron D, Acevedo-Whitehouse K

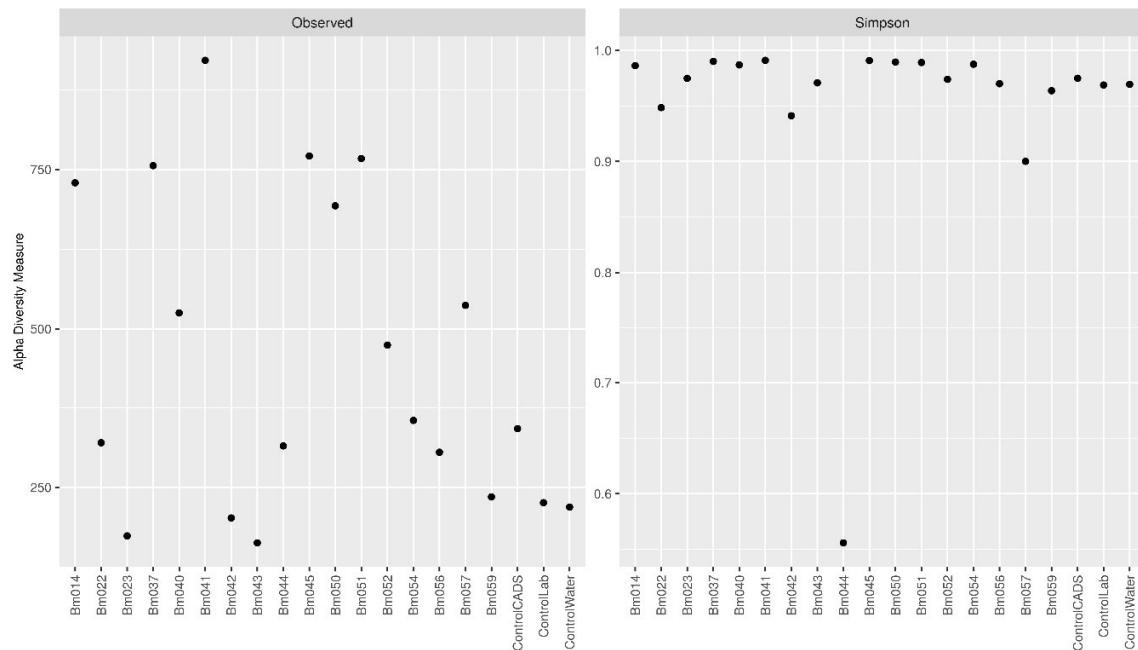

**Figure 1.** Bacterial alpha diversity measures in blue whale blow samples and technical controls.

## Core respiratory microbiome of the blue whale, *Balaenoptera musculus*

Domínguez-Sánchez C, Álvarez-Martínez RC, Gendron D, Acevedo-Whitehouse K

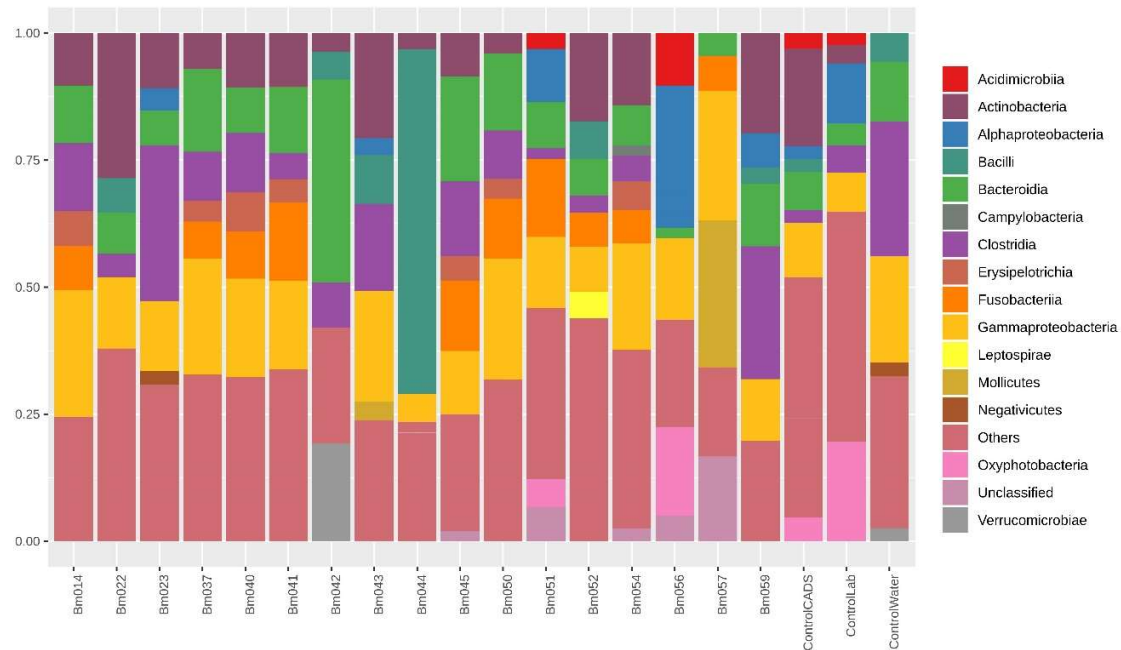

**Figure 2.** The phylogenetically diverse assemblage of all samples (whale blows and technical controls). Plot shows the sixteen identified bacterial classes, unclassified, and “others” (sum of bacteria that did not reach the detection threshold of 0.02%).

## Core respiratory microbiome of the blue whale, *Balaenoptera musculus*

Domínguez-Sánchez C, Álvarez-Martínez RC, Gendron D, Acevedo-Whitehouse K

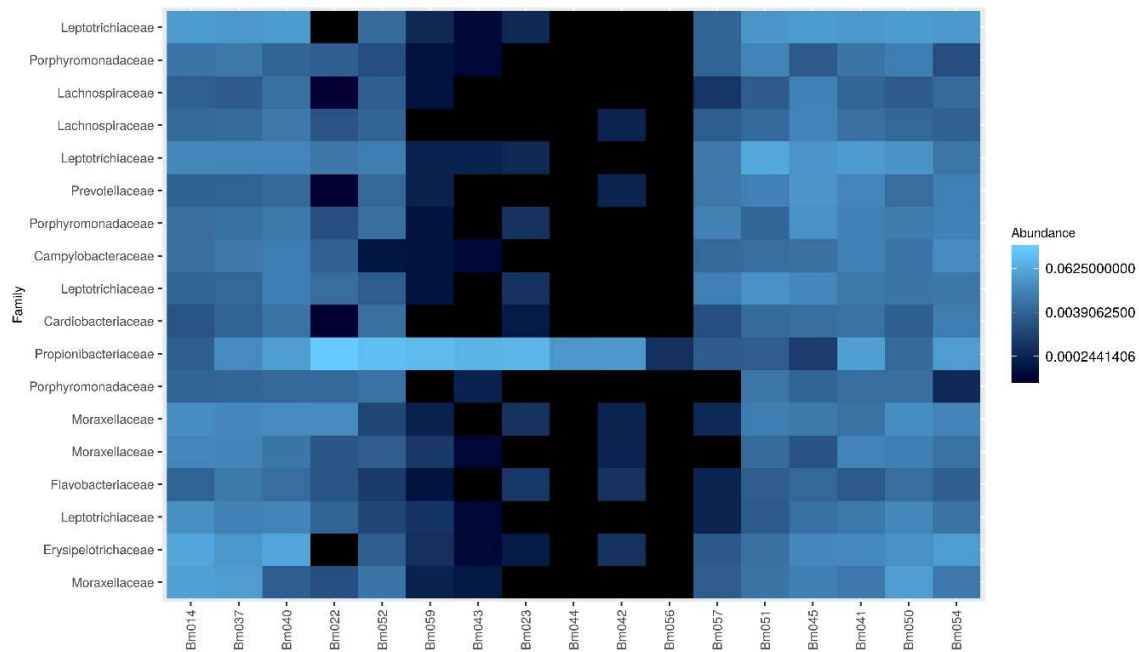

**Figure 3.** Relative abundance of bacterial classes that form the core respiratory microbiome of the blue whale (Eighteen ASVs present in more than 50% of the blow samples).
